# Supplementary material for: DichroIDP: a method for analyses of intrinsically disordered proteins using circular dichroism spectroscopy
Source: PubMed Central journal article supplement (PMC10409736; doi:10.1038/s42003-023-05178-2), 2023-08-08

**Supplementary Information for DichroIDP: A Novel Method for Analyses for Intrinsicly Disordered Proteins Using Circular Dichroism Spectroscopy (Miles, Drew, and Wallace)**

**Supplementary Tables and Supplementary Figure S1**

**Supplementary Table S1 (Top).**

**Secondary structures assigned for IDP proteins included to create the IDP175 reference data set (RDS).** The secondary structures were predicted by AlphaFold2<sup>21</sup> and described in the Methods section with DSSP<sup>23</sup>-defined values for helix (H), sheet (E), turn (T), and disordered (D) structures. The corresponding spectroscopic and metadata have been deposited in the Protein Circular Dichroism Data Bank<sup>28</sup> (PCDDDB) (entry IDs are given in column 7).

| Protein                 | Uniprot ID | <u>Secondary structures (%)<br/>derived from AlphaFold2 structure</u> |   |    |     | PCDDB ID     |
|-------------------------|------------|-----------------------------------------------------------------------|---|----|-----|--------------|
|                         |            | H                                                                     | E | T  | D   |              |
| MEG-14                  | M1GUG5     | 0                                                                     | 0 | 0  | 100 | CD0004064000 |
| HASPA                   | P90552     | 0                                                                     | 0 | 3  | 97  | CD0006406000 |
| HASPB                   | Q25326     | 0                                                                     | 0 | 3  | 97  | CD0006407000 |
| TARP <sub>174-222</sub> | Q6GX35     | 7                                                                     | 0 | 16 | 77  | CD0006408000 |
| Beta-casein             | P02666     | 28                                                                    | 0 | 7  | 64  | CD0006409000 |

**Supplementary Table S1 (Bottom).**

**Secondary Structures of the Test Proteins.** All of the spectroscopic and metadata for these proteins have been deposited in the Protein Circular Dichroism Data Bank. [H= helix, E= sheet, T=turn, D=disordered]

| <u>Protein Type</u>                     | Uniprot ID | Secondary Structures (%) from AlphaFold2/Crystal Structure |    |    |    | PCDDB ID     |
|-----------------------------------------|------------|------------------------------------------------------------|----|----|----|--------------|
|                                         |            | H                                                          | E  | T  | D  |              |
| <b>Disordered</b>                       |            |                                                            |    |    |    |              |
| Osteopontin                             | P10451     | 9                                                          | 0  | 1  | 91 | CD000366700  |
| Amelogenin                              | A0A6P5P1L3 | 15                                                         | 0  | 7  | 78 | CD000641000  |
| Sic1Inhibitor                           | P38634     | 13                                                         | 4  | 10 | 74 | CD000641100  |
| BB1 Cterm <sub>1-94</sub>               | -          | 23                                                         | 0  | 6  | 72 | CD000641200  |
| <b>Mostly <math>\beta</math>1</b>       |            |                                                            |    |    |    |              |
| b2-                                     |            |                                                            |    |    |    |              |
| Microglobulin                           | P61769     | 0                                                          | 47 | 21 | 32 | CD0003894000 |
| Prealbumin                              | P02766     | 6                                                          | 45 | 24 | 26 | CD0000091000 |
| Bence Jones                             | P01699     | 5                                                          | 47 | 23 | 25 | CD0000077000 |
| eGFP pH7.4                              | C5MKY7     | 22                                                         | 44 | 20 | 15 | CD0004251000 |
| <b>Mostly <math>\beta</math>2</b>       |            |                                                            |    |    |    |              |
| MAGI-1 PDZ1                             | Q96QZ7     | 14                                                         | 25 | 22 | 38 | CD0005960000 |
| UTPase                                  | P33316     | 6                                                          | 35 | 23 | 37 | CD0003897000 |
| Ecotin                                  | P23827     | 8                                                          | 45 | 12 | 36 | CD0003896000 |
| Trypsin                                 | P00760     | 10                                                         | 29 | 27 | 35 | CD0000096000 |
| <b>Mostly <math>\alpha/\beta</math></b> |            |                                                            |    |    |    |              |
| Pokeweed                                | Q9AVB0     | 17                                                         | 7  | 41 | 36 | CD0006413000 |
| Saporin                                 | P20656     | 34                                                         | 17 | 19 | 29 | CD0006414000 |
| <b>Mostly <math>\alpha</math></b>       |            |                                                            |    |    |    |              |
| $\alpha$ -Lactalbumin                   | P00709     | 40                                                         | 6  | 23 | 32 | CD0000072000 |

**Supplementary Table S2. Secondary Structure Assignments and PCDDDB IDs for the SP175 Database Proteins.** The secondary structures are as defined in the Methods Section using DSSP<sup>23</sup> values for Helix (H), Sheet (E), Turn (T), and Disordered (D). These values were calculated from their crystallographic entries in the PDB<sup>22</sup> (second column). Their spectral data are available in the PCDDDB<sup>28</sup>. (Note that for some entries in the PCDDDB the PCDDBid contains a “1” in the 10<sup>th</sup> position of the name, indicating a revised spectra). Five proteins from the original SP175<sup>8</sup> dataset are not included (see text). These are the proteins containing highly-twisted, right-handed antiparallel beta sheets that give rise to  $\beta$ 2-like spectra: alpha-chymotrypsin, alpha-chymotrypsinogen, elastase, and soybean trypsin inhibitor. Ferredoxin was also omitted due to its anomalous  $\beta$ 2-like spectrum.

| Protein                    | PDB ID | Secondary structures (%) |    |    |    | PCDDB ID     |
|----------------------------|--------|--------------------------|----|----|----|--------------|
|                            |        | H                        | E  | T  | D  |              |
| Aldolase                   | 1ado   | 46                       | 14 | 16 | 24 | CD0000001000 |
| Alkaline phosphatase       | 1ed9   | 31                       | 19 | 25 | 25 | CD0000002100 |
| Alpha amylase              | 1vjs   | 29                       | 21 | 24 | 27 | CD0000003000 |
| Alpha bungarotoxin         | 1hc9   | 5                        | 37 | 27 | 31 | CD0000004000 |
| Aprotinin                  | 5pti   | 21                       | 24 | 22 | 33 | CD0000007000 |
| Avidin                     | 1rav   | 7                        | 46 | 16 | 32 | CD0000008100 |
| Beta amylase               | 1fa2   | 38                       | 11 | 22 | 29 | CD0000009000 |
| Beta galactosidase         | 1dp0   | 14                       | 38 | 22 | 26 | CD0000010000 |
| Beta lactoglobulin         | 3blg   | 14                       | 38 | 28 | 19 | CD0000011000 |
| Beta-B2 crystallin         | 2bb2   | 7                        | 43 | 17 | 32 | CD0000022000 |
| Gamma-B crystallin         | 4gcr   | 9                        | 46 | 20 | 25 | CD0000023000 |
| Gamma-D crystallin         | 1elp   | 9                        | 43 | 25 | 23 | CD0000024000 |
| Gamma-E-crystallin         | 1m8u   | 6                        | 43 | 24 | 26 | CD0000025000 |
| c-Phycocyanin              | 1ha7   | 78                       | 0  | 12 | 10 | CD0000012000 |
| Calmodulin                 | 1lin   | 57                       | 5  | 19 | 19 | CD0000013000 |
| Carbonic anhydrase I       | 1hcb   | 18                       | 29 | 26 | 27 | CD0000014000 |
| Carbonic anhydrase II      | 1v9e   | 16                       | 29 | 28 | 28 | CD0000015000 |
| Carboxypeptidase A1        | 5cpa   | 38                       | 16 | 25 | 21 | CD0000016000 |
| Catalase                   | 1dgf   | 34                       | 17 | 25 | 25 | CD0000017000 |
| Ceruloplasmin              | 1kcw   | 12                       | 33 | 25 | 30 | CD0000018000 |
| Citrate synthase           | 1cts   | 60                       | 1  | 17 | 22 | CD0000019100 |
| Concanavalin A             | 1nls   | 4                        | 46 | 25 | 25 | CD0000020000 |
| Cytochrome C               | 1hrc   | 41                       | 0  | 25 | 34 | CD0000021000 |
| 3-dehydroquinatase         | 1qfe   | 46                       | 19 | 18 | 18 | CD0000028000 |
| 3-dehydroquinatase         | 2dhq   | 44                       | 17 | 16 | 23 | CD0000029000 |
| Deoxyribonuclease-1        | 3dni   | 29                       | 26 | 18 | 26 | CD0000030000 |
| Gamma-s-crystallin Ct      | 1ha4   | 10                       | 45 | 22 | 23 | CD0000026000 |
| Glucose oxidase            | 1cf3   | 34                       | 19 | 21 | 25 | CD0000033000 |
| Glutamate dehydrogenase I  | 3mw9   | 48                       | 12 | 21 | 18 | CD0000034000 |
| Glycogen phosphorylase-b   | 1gpb   | 51                       | 15 | 17 | 17 | CD0000035100 |
| Haloalkane dehalogenase    | 1bn6   | 46                       | 18 | 17 | 18 | CD0000036000 |
| Hemoglobin                 | 1hda   | 76                       | 0  | 12 | 12 | CD0000037100 |
| Human serum albumin        | 1n5u   | 72                       | 0  | 15 | 13 | CD0000038100 |
| Gamma-D crystallin (Human) | 1hk0   | 8                        | 49 | 21 | 22 | CD0000027100 |

|                            |      |    |    |    |    |              |
|----------------------------|------|----|----|----|----|--------------|
| Immunoglobulin G           | 1igt | 7  | 44 | 19 | 30 | CD0000039100 |
| Insulin                    | 1trz | 67 | 0  | 5  | 29 | CD0000040000 |
| Jacalin                    | 1ku8 | 0  | 66 | 14 | 20 | CD0000041000 |
| Lactoferrin                | 1blf | 33 | 18 | 31 | 18 | CD0000042000 |
| Lectin (lentil)            | 1les | 3  | 44 | 25 | 27 | CD0000043000 |
| Leptin                     | 1ax8 | 61 | 0  | 8  | 31 | CD0000044000 |
| Lysozyme                   | 193l | 40 | 6  | 33 | 20 | CD0000045000 |
| Monellin                   | 1mol | 18 | 53 | 13 | 16 | CD0000046000 |
| Myoglobin                  | 1ymb | 75 | 0  | 14 | 11 | CD0000047000 |
| Myoglobin                  | 1a6m | 78 | 0  | 11 | 11 | CD0000048000 |
| NmrA                       | 1k6j | 37 | 16 | 20 | 27 | CD0000049000 |
| Ovalbumin                  | 1ova | 29 | 29 | 14 | 28 | CD0000050000 |
| Ovotransferrin             | 1dot | 30 | 17 | 32 | 21 | CD0000051000 |
| Papain                     | 1ppn | 26 | 18 | 24 | 33 | CD0000052000 |
| Lectin (pea)               | 1ofs | 3  | 43 | 25 | 30 | CD0000053000 |
| Pectate lyase C            | 1air | 13 | 32 | 26 | 29 | CD0000054000 |
| Pepsinogen                 | 2psg | 15 | 36 | 19 | 30 | CD0000055000 |
| Peroxidase C1              | 7atj | 50 | 2  | 28 | 20 | CD0000056000 |
| Phosphoglucomutase 1       | 3pmg | 36 | 25 | 21 | 18 | CD0000057000 |
| Phosphoglycerate kinase    | 3pgk | 35 | 11 | 27 | 28 | CD0000058000 |
| Phospholipase A2           | 1une | 50 | 7  | 22 | 22 | CD0000059000 |
| PNMT                       | 1hnn | 34 | 22 | 19 | 25 | CD0000060000 |
| Pyruvate Kinase            | 1a49 | 39 | 18 | 22 | 21 | CD0000061100 |
| Rhodanese                  | 1rhs | 33 | 13 | 25 | 30 | CD0000062000 |
| Ribonuclease, pancreatic   | 3rn3 | 21 | 33 | 25 | 21 | CD0000063100 |
| Rubredoxin                 | 1r0i | 17 | 15 | 28 | 41 | CD0000064000 |
| Streptavidin               | 1stp | 8  | 55 | 17 | 20 | CD0000066000 |
| Subtilisin Carlsberg       | 1scd | 29 | 17 | 27 | 27 | CD0000067100 |
| Superoxide Dismutase       | 1cbj | 4  | 39 | 30 | 27 | CD0000068000 |
| Thaumatococin I            | 1thw | 11 | 36 | 27 | 27 | CD0000069000 |
| Triose Phosphate Isomerase | 7tim | 45 | 16 | 17 | 22 | CD0000070000 |
| Ubiquitin                  | 1ubi | 25 | 32 | 18 | 25 | CD0000071000 |

---

**Supplementary Table S3. Cross validation results for the disordered secondary structure fraction**, as produced using different methods for calculating the secondary structure fraction of the IDPs in the IDP175 RDS. The statistical parameters,  $r$ ,  $\delta$ ,  $\zeta$ , are described in the main text.

| <b>Method</b>     | <b>r</b> | <b><math>\delta</math></b> | <b><math>\zeta</math></b> |
|-------------------|----------|----------------------------|---------------------------|
| <b>AlphaFold2</b> | 0.9322   | 0.0649                     | 2.6987                    |
| <b>NetSurfP</b>   | 0.9253   | 0.0712                     | 2.5881                    |
| <b>RaptorX</b>    | 0.9129   | 0.0715                     | 2.4265                    |
| <b>Spot1D</b>     | 0.8870   | 0.0795                     | 2.0897                    |

**Supplementary Table S4. Secondary structures (%) of proteins that were not included in the data base, whose spectra are shown in Figure S1.** The secondary structures are as predicted by AlphaFold2 (see text for explanation).

| <b>Protein</b>          | <b>Alphafold2-defined<br/>Secondary<br/>Structure (%)</b> |          |          |          |
|-------------------------|-----------------------------------------------------------|----------|----------|----------|
|                         | <b>H</b>                                                  | <b>E</b> | <b>T</b> | <b>D</b> |
| SHERP                   | 90                                                        | 0        | 2        | 8        |
| a-synuclein             | 45                                                        | 0        | 20       | 35       |
| b-synuclein             | 45                                                        | 0        | 20       | 35       |
| TARP <sub>726-825</sub> | 26                                                        | 0        | 16       | 58       |

**Supplementary Table S5.** Calculated secondary structures for the test proteins using DichroIDP with the new IDP175 reference data sets, and (from left to right) the existing SP175/SP175t<sup>8</sup>, CDPro42<sup>10</sup> and SP175+<sup>17</sup> reference data sets. NRMSD is the “goodness-of-fit parameter” (see main text and reference 11). The designations of the secondary structure are H= helix, E= sheet, T=turn, D=disordered. The low-wavelength cutoffs of the data used are in indicated (in rows 3 and 4, and for of each entry as either 190 nm or the lowest wavelength in the spectrum (if lower than 190 nm). CDPro42 does not calculate results down to 175 nm.

|                                      | IDP175/190 |    |    |    |       | SP175/SP175t <sup>8</sup> |    |    |    |       | CDPro42 <sup>10</sup> |    |    |    |       | SP175+ <sup>17</sup> (BeStSel-modified SP175) <sup>12</sup> |    |    |    |       |
|--------------------------------------|------------|----|----|----|-------|---------------------------|----|----|----|-------|-----------------------|----|----|----|-------|-------------------------------------------------------------|----|----|----|-------|
| <b>Osteopontin</b> Mostly disordered |            |    |    |    |       |                           |    |    |    |       |                       |    |    |    |       |                                                             |    |    |    |       |
| Method/cutoff                        | H          | E  | T  | D  | NRMSD | H                         | E  | T  | D  | NRMSD | H                     | E  | T  | D  | NRMSD | H                                                           | E  | T  | D  | NRMSD |
| DSSP/ AlphaFold2                     | 9          | 0  | 1  | 91 |       | 9                         | 0  | 1  | 91 |       | 9                     | 0  | 1  | 91 |       | 9                                                           | 0  | 1  | 91 |       |
| DSSP/PDB                             | -          | -  | -  | -  |       | -                         | -  | -  | -  |       | -                     | -  | -  | -  |       | -                                                           | -  | -  | -  |       |
| DichroIDP 190                        | 7          | 1  | 8  | 84 | 0.034 | 12                        | 25 | 22 | 40 | 0.011 | 6                     | 6  | 5  | 82 | 0.011 | 12                                                          | 25 | 23 | 40 | 0.050 |
| DichroIDP 175                        | 7          | 0  | 10 | 81 | 0.083 | 11                        | 29 | 19 | 41 | 0.011 | -                     | -  | -  | -  |       | 11                                                          | 29 | 19 | 41 | 0.011 |
| <b>Sic1</b> Mostly disordered        |            |    |    |    |       |                           |    |    |    |       |                       |    |    |    |       |                                                             |    |    |    |       |
| Method/cutoff                        | H          | E  | T  | D  | NRMSD | H                         | E  | T  | D  | NRMSD | H                     | E  | T  | D  | NRMSD | H                                                           | E  | T  | D  | NRMSD |
| DSSP/ AlphaFold2                     | 13         | 4  | 10 | 74 |       | 13                        | 4  | 10 | 74 |       | 13                    | 4  | 10 | 74 |       | 13                                                          | 4  | 10 | 74 |       |
| DSSP/PDB                             | -          | -  | -  | -  |       | -                         | -  | -  | -  |       | -                     | -  | -  | -  |       | -                                                           | -  | -  | -  |       |
| DichroIDP 190                        | 12         | 9  | 13 | 65 | 0.041 | 14                        | 32 | 24 | 29 | 0.000 | 4                     | 17 | 13 | 62 | 0.029 | 14                                                          | 32 | 24 | 29 | 0.000 |
| <b>Amelogenin</b> Mostly disordered  |            |    |    |    |       |                           |    |    |    |       |                       |    |    |    |       |                                                             |    |    |    |       |
| Method/cutoff                        | H          | E  | T  | D  | NRMSD | H                         | E  | T  | D  | NRMSD | H                     | E  | T  | D  | NRMSD | H                                                           | E  | T  | D  | NRMSD |
| DSSP/ AlphaFold2                     | 15         | 0  | 7  | 78 |       | 15                        | 0  | 7  | 78 |       | 15                    | 0  | 7  | 78 |       | 15                                                          | 0  | 7  | 78 |       |
| DSSP/PDB                             | -          | -  | -  | -  |       | -                         | -  | -  | -  |       | -                     | -  | -  | -  |       | -                                                           | -  | -  | -  |       |
| DichroIDP 190                        | 16         | 5  | 15 | 64 | 0.033 | 16                        | 22 | 26 | 37 | 0.033 | 9                     | 27 | 20 | 43 | 0.031 | 17                                                          | 18 | 25 | 38 | 0.032 |
| <b>BB1 1-94</b> Mostly disordered    |            |    |    |    |       |                           |    |    |    |       |                       |    |    |    |       |                                                             |    |    |    |       |
| Method/cutoff                        | H          | E  | T  | D  | NRMSD | H                         | E  | T  | D  | NRMSD | H                     | E  | T  | D  | NRMSD | H                                                           | E  | T  | D  | NRMSD |
| DSSP/ AlphaFold2                     | 23         | 0  | 6  | 72 |       | 23                        | 0  | 6  | 72 |       | 23                    | 0  | 6  | 72 |       | 23                                                          | 0  | 6  | 72 |       |
| DSSP/PDB                             | --         | -  | -  | -  |       | -                         | -  | -  | -  |       | -                     | -  | -  | -  |       | -                                                           | -  | -  | -  |       |
| DichroIDP 190                        | 8          | -1 | 9  | 85 | 0.020 | 13                        | 21 | 25 | 42 | 0.084 | 9                     | 14 | 13 | 64 | 0.009 | 16                                                          | 22 | 26 | 37 | 0.014 |
| DichroIDP 175                        | 8          | 6  | 11 | 74 | 0.015 | 13                        | 19 | 26 | 43 | 0.016 | -                     | -  | -  | -  |       | 10                                                          | 23 | 25 | 42 | 0.020 |

| <b>β-2 microglobulin</b> Mostly β1 |   |    |    |    |       |   |    |    |    |       |   |    |    |    |       |   |    |    |    |       |
|------------------------------------|---|----|----|----|-------|---|----|----|----|-------|---|----|----|----|-------|---|----|----|----|-------|
| Method/cutoff                      | H | E  | T  | D  | NRMSD | H | E  | T  | D  | NRMSD | H | E  | T  | D  | NRMSD | H | E  | T  | D  | NRMSD |
| DSSP/ AlphaFold2                   | 0 | 47 | 21 | 32 |       | 0 | 47 | 21 | 32 |       | 0 | 47 | 21 | 32 |       | 0 | 47 | 21 | 32 |       |
| DSSP / PDB 2YXF                    | 3 | 48 | 17 | 32 |       | 3 | 48 | 17 | 32 |       | 3 | 48 | 17 | 32 |       | 3 | 48 | 17 | 32 |       |
| DichroIDP 190                      | 7 | 45 | 19 | 29 | 0.071 | 7 | 45 | 19 | 29 | 0.071 | 0 | 48 | 27 | 26 | 0.026 | 3 | 48 | 17 | 31 | 0.050 |
| DichroIDP 175                      | 6 | 47 | 19 | 29 | 0.047 | 6 | 47 | 18 | 29 | 0.047 | - | -  | -  | -  |       | 3 | 49 | 17 | 30 | 0.029 |

| <b>Prealbumin</b> Mostly β1 |    |    |    |    |       |    |    |    |    |       |   |    |    |    |       |    |    |    |    |       |
|-----------------------------|----|----|----|----|-------|----|----|----|----|-------|---|----|----|----|-------|----|----|----|----|-------|
| Method/cutoff               | H  | E  | T  | D  | NRMSD | H  | E  | T  | D  | NRMSD | H | E  | T  | D  | NRMSD | H  | E  | T  | D  | NRMSD |
| DSSP/ AlphaFold2            | 6  | 45 | 24 | 26 |       | 6  | 45 | 24 | 26 |       | 6 | 45 | 24 | 26 |       | 6  | 45 | 24 | 26 |       |
| DSSP / PDB 2PAB             | 6  | 47 | 20 | 28 |       | 6  | 47 | 20 | 28 |       | 6 | 47 | 20 | 28 |       | 6  | 47 | 20 | 28 |       |
| DichroIDP 190               | 12 | 37 | 23 | 26 | 0.067 | 12 | 37 | 23 | 26 | 0.067 | 8 | 47 | 20 | 25 | 0.043 | 12 | 35 | 25 | 25 | 0.070 |
| DichroIDP 180               | 14 | 37 | 22 | 28 | 0.053 | 14 | 37 | 22 | 28 | 0.056 | - | -  | -  | -  |       | 14 | 36 | 22 | 28 | 0.001 |

| <b>Bence Jones protein</b> Mostly β1 |    |    |    |    |       |    |    |    |    |       |   |    |    |    |       |    |    |    |    |       |
|--------------------------------------|----|----|----|----|-------|----|----|----|----|-------|---|----|----|----|-------|----|----|----|----|-------|
| Method/cutoff                        | H  | E  | T  | D  | NRMSD | H  | E  | T  | D  | NRMSD | H | E  | T  | D  | NRMSD | H  | E  | T  | D  | NRMSD |
| DSSP/ AlphaFold2                     | 5  | 47 | 23 | 25 |       | 5  | 47 | 23 | 25 |       | 5 | 47 | 23 | 25 |       | 5  | 47 | 23 | 25 |       |
| DSSP / PDB 2RHE                      | 3  | 43 | 27 | 27 |       | 3  | 43 | 27 | 27 |       | 3 | 43 | 27 | 27 |       | 3  | 43 | 27 | 27 |       |
| DichroIDP 190                        | 7  | 44 | 19 | 30 | 0.000 | 7  | 44 | 19 | 30 | 0.000 | 4 | 42 | 23 | 30 | 0.028 | 7  | 44 | 19 | 30 | 0.000 |
| DichroIDP 175                        | 15 | 36 | 19 | 30 | 0.013 | 15 | 36 | 19 | 30 | 0.013 | - | -  | -  | -  |       | 15 | 36 | 19 | 30 | 0.013 |

| <b>eGFP</b> Mostly β1 |    |    |    |    |       |    |    |    |    |       |    |    |    |    |       |    |    |    |    |       |
|-----------------------|----|----|----|----|-------|----|----|----|----|-------|----|----|----|----|-------|----|----|----|----|-------|
| Method/cutoff         | H  | E  | T  | D  | NRMSD | H  | E  | T  | D  | NRMSD | H  | E  | T  | D  | NRMSD | H  | E  | T  | D  | NRMSD |
| DSSP/ AlphaFold2      | 22 | 44 | 20 | 15 |       | 22 | 44 | 20 | 15 |       | 22 | 44 | 20 | 15 |       | 22 | 44 | 20 | 15 |       |
| DSSP/PDB              | -  | -  | -  | -  |       | -  | -  | -  | -  |       | -  | -  | -  | -  |       | -  | -  | -  | -  |       |
| DichroIDP 190         | 12 | 40 | 24 | 24 | 0.106 | 12 | 40 | 24 | 25 | 0.106 | 11 | 42 | 24 | 24 | 0.017 | 15 | 35 | 24 | 25 | 0.039 |
| DichroIDP 182         | 14 | 37 | 24 | 26 | 0.125 | 14 | 37 | 24 | 25 | 0.125 | -  | -  | -  | -  |       | 15 | 36 | 24 | 26 | 0.044 |

| <b>MAGI 1PDZ1</b> Mostly β2 |    |    |    |    |       |    |    |    |    |       |    |    |    |    |       |    |    |    |    |       |
|-----------------------------|----|----|----|----|-------|----|----|----|----|-------|----|----|----|----|-------|----|----|----|----|-------|
| Method/cutoff               | H  | E  | T  | D  | NRMSD | H  | E  | T  | D  | NRMSD | H  | E  | T  | D  | NRMSD | H  | E  | T  | D  | NRMSD |
| DSSP/ AlphaFold2            | 14 | 25 | 22 | 38 |       | 14 | 25 | 22 | 38 |       | 14 | 25 | 22 | 38 |       | 14 | 25 | 22 | 38 |       |
| DSSP / PDB 2KPK             | 12 | 32 | 31 | 26 |       | 12 | 32 | 31 | 26 |       | 12 | 32 | 31 | 26 |       | 12 | 32 | 31 | 26 |       |

DichroIDP 190 20 15 15 49 0.090 19 26 21 35 0.089 22 21 21 36 0.049 18 26 21 35 0.089

**UTPase** Mostly  $\beta$ 2

| Method/cutoff    | H  | E  | T  | D  | NRMSD | H  | E  | T  | D  | NRMSD | H  | E  | T  | D  | NRMSD | H  | E  | T  | D  | NRMSD |
|------------------|----|----|----|----|-------|----|----|----|----|-------|----|----|----|----|-------|----|----|----|----|-------|
| DSSP/ AlphaFold2 | 6  | 35 | 23 | 37 |       | 6  | 35 | 23 | 37 |       | 6  | 35 | 23 | 37 |       | 6  | 35 | 23 | 37 |       |
| DSSP / PDB 1Q5U  | 5  | 39 | 18 | 38 |       | 5  | 39 | 18 | 38 |       | 5  | 39 | 18 | 38 |       | 5  | 39 | 18 | 38 |       |
| DichroIDP 190    | 15 | 23 | 13 | 49 | 0.029 | 12 | 33 | 22 | 32 | 0.027 | 15 | 24 | 19 | 43 | 0.023 | 11 | 34 | 22 | 32 | 0.055 |
| DichroIDP 175    | 9  | 33 | 26 | 30 | 0.004 | 12 | 33 | 24 | 32 | 0.003 | -  | -  | -  | -  |       | 11 | 34 | 24 | 33 | 0.055 |

**Ecotin** Mostly  $\beta$ 2

| Method/cutoff    | H  | E  | T  | D  | NRMSD | H  | E  | T  | D  | NRMSD | H  | E  | T  | D  | NRMSD | H  | E  | T  | D  | NRMSD |
|------------------|----|----|----|----|-------|----|----|----|----|-------|----|----|----|----|-------|----|----|----|----|-------|
| DSSP/ AlphaFold2 | 8  | 45 | 12 | 36 |       | 8  | 45 | 12 | 36 |       | 8  | 45 | 12 | 36 |       | 8  | 45 | 12 | 36 |       |
| DSSP / PDB 1ECZ  | 2  | 40 | 18 | 40 |       | 2  | 40 | 18 | 40 |       | 2  | 40 | 18 | 40 |       | 2  | 40 | 18 | 40 |       |
| DichroIDP 190    | 21 | 5  | 12 | 62 | 0.003 | 15 | 27 | 24 | 35 | 0.083 | 14 | 31 | 23 | 31 | 0.017 | 14 | 30 | 24 | 33 | 0.045 |
| DichroIDP 178    | 28 | 0  | 7  | 64 | 0.002 | 12 | 31 | 24 | 34 | 0.007 | -  | -  | -  | -  |       | 12 | 11 | 24 | 34 | 0.007 |

**Trypsin** Mostly  $\beta$ 2

| Method/cutoff    | H  | E  | T  | D  | NRMSD | H  | E  | T  | D  | NRMSD | H  | E  | T  | D  | NRMSD | H  | E  | T  | D  | NRMSD |
|------------------|----|----|----|----|-------|----|----|----|----|-------|----|----|----|----|-------|----|----|----|----|-------|
| DSSP/ AlphaFold2 | 10 | 29 | 27 | 35 |       | 10 | 29 | 27 | 35 |       | 10 | 29 | 27 | 35 |       | 10 | 29 | 27 | 35 |       |
| DSSP / PDB 1AUJ  | 10 | 29 | 26 | 35 |       | 10 | 29 | 26 | 35 |       | 10 | 29 | 26 | 35 |       | 10 | 29 | 26 | 35 |       |
| DichroIDP 190    | 9  | 16 | 15 | 59 | 0.030 | 13 | 29 | 23 | 36 | 0.073 | 7  | 25 | 18 | 51 | 0.099 | 13 | 29 | 23 | 36 | 0.105 |
| DichroIDP 175    | 0  | 0  | 0  | 1  | 0.004 | 10 | 30 | 19 | 41 | 0.000 | -  | -  | -  | -  |       | 10 | 30 | 19 | 41 | 0.000 |

**Pokeweed lectin** Mostly  $\alpha/\beta$

| Method/cutoff    | H  | E  | T  | D  | NRMSD | H  | E  | T  | D  | NRMSD | H  | E  | T  | D  | NRMSD | H  | E  | T  | D  | NRMSD |
|------------------|----|----|----|----|-------|----|----|----|----|-------|----|----|----|----|-------|----|----|----|----|-------|
| DSSP/ AlphaFold2 | 17 | 7  | 41 | 36 |       | 17 | 7  | 41 | 36 |       | 17 | 7  | 41 | 36 |       | 17 | 7  | 41 | 36 |       |
| DSSP/PDB         | -  | -  | -  | -  |       | -  | -  | -  | -  |       | -  | -  | -  | -  |       | -  | -  | -  | -  |       |
| DichroIDP 190    | 6  | 26 | 23 | 45 | 0.102 | 9  | 34 | 26 | 32 | 0.091 | 4  | 39 | 30 | 26 | 0.000 | 9  | 32 | 27 | 32 | 0.032 |
| DichroIDP 180    | 1  | 39 | 30 | 32 | 0.008 | 14 | 32 | 24 | 29 | 0.000 | -  | -  | -  | -  |       | 14 | 32 | 24 | 29 | 0.000 |

**Saporin** Mostly  $\alpha/\beta$

| Method/cutoff    | H  | E  | T  | D  | NRMSD | H  | E  | T  | D  | NRMSD | H  | E  | T  | D  | NRMSD | H  | E  | T  | D  | NRMSD |
|------------------|----|----|----|----|-------|----|----|----|----|-------|----|----|----|----|-------|----|----|----|----|-------|
| DSSP/ AlphaFold2 | 33 | 17 | 19 | 29 |       | 33 | 17 | 19 | 29 |       | 33 | 17 | 19 | 29 |       | 33 | 17 | 19 | 29 |       |



|                        |    |    |    |    |       |    |    |    |    |       |    |    |    |    |       |    |    |    |    |       |
|------------------------|----|----|----|----|-------|----|----|----|----|-------|----|----|----|----|-------|----|----|----|----|-------|
| <b>DSSP / PDB 1QI7</b> | 37 | 20 | 20 | 24 |       | 37 | 20 | 20 | 34 |       | 37 | 20 | 20 | 24 |       | 37 | 20 | 20 | 24 |       |
| <b>DichroIDP 190</b>   | 29 | 24 | 24 | 23 | 0.079 | 30 | 23 | 24 | 22 | 0.079 | 28 | 23 | 23 | 26 | 0.033 | 26 | 26 | 23 | 23 | 0.069 |
| <b>DichroIDP 175</b>   | 33 | 15 | 28 | 23 | 0.050 | 33 | 15 | 28 | 23 | 0.050 | -  | -  | -  | -  |       | 32 | 17 | 27 | 23 | 0.050 |

| <b><math>\alpha</math>-lactalbumin</b> |          |          |          |          |              |          |          |          |          |              |          |          |          |          |              |          |          |          |          |              |
|----------------------------------------|----------|----------|----------|----------|--------------|----------|----------|----------|----------|--------------|----------|----------|----------|----------|--------------|----------|----------|----------|----------|--------------|
| <u>Mostly <math>\alpha</math></u>      |          |          |          |          |              |          |          |          |          |              |          |          |          |          |              |          |          |          |          |              |
| <b>Method/cutoff</b>                   | <b>H</b> | <b>E</b> | <b>T</b> | <b>D</b> | <b>NRMSD</b> | <b>H</b> | <b>E</b> | <b>T</b> | <b>D</b> | <b>NRMSD</b> | <b>H</b> | <b>E</b> | <b>T</b> | <b>D</b> | <b>NRMSD</b> | <b>H</b> | <b>E</b> | <b>T</b> | <b>D</b> | <b>NRMSD</b> |
| <b>DSSP/ AlphaFold2</b>                | 40       | 6        | 23       | 32       |              | 40       | 6        | 23       | 32       |              | 40       | 6        | 23       | 32       |              | 40       | 6        | 23       | 32       |              |
| <b>DSSP/PDB 1HML</b>                   | 43       | 7        | 29       | 22       |              | 43       | 7        | 29       | 22       |              | 43       | 7        | 29       | 22       |              | 43       | 7        | 29       | 22       |              |
| <b>DichroIDP 190</b>                   | 39       | 7        | 27       | 25       | 0.060        | 39       | 8        | 27       | 25       | 0.054        | 40       | 5        | 20       | 34       | 0.064        | 39       | 8        | 28       | 25       | 0.054        |
| <b>DichroIDP 175</b>                   | 37       | 13       | 25       | 24       | 0.021        | 37       | 13       | 26       | 23       | 0.021        | -        | -        | -        | -        |              | 39       | 11       | 27       | 22       | 0.026        |

Notes: An NRMSD of 0.000 for DichroIDP can arise when the value is very small ( $>0.001$ ), usually resulting from inaccurate concentration or pathlength values used during data collection and could be rectified by scaling the spectrum using the scaling function in DichroIDP.

**Supplementary Table S6. Calculated secondary structures for the test proteins using BeStSel<sup>12</sup> (left) and K2D3<sup>29</sup> (right) methods.** The designations of the secondary structure types by each method are as described in references 12 [where “Turn” and “Disorder” are defined differently by the BeStSel method from those parameters in Supplementary Tables S5 and S7] and 29, respectively, where H= helix, E= sheet, T=turn, D=disordered, O=other.

| <u>BeStSel</u>                       |    |    |    |    |       | <u>K2D3</u>      |    |    |    |
|--------------------------------------|----|----|----|----|-------|------------------|----|----|----|
| <b>Osteopontin</b> Mostly disordered |    |    |    |    |       |                  |    |    |    |
| Method/cutoff                        | H  | E  | T  | D  | NRMSD | H                | E  | O  |    |
| DSSP/ AlphaFold2                     | 9  | 0  | 1  | 91 |       | DSSP/ AlphaFold2 | 9  | 0  | 92 |
| DSSP/PDB                             | -  | -  | -  | -  |       | DSSP/PDB         | -  | -  | -  |
| BeStSel                              | 4  | 27 | 20 | 49 | 0.042 | K2D3             | 4  | 37 | 59 |
| <b>Sic1</b> Mostly disordered        |    |    |    |    |       |                  |    |    |    |
| Method/cutoff                        | H  | E  | T  | D  | NRMSD | H                | E  | O  |    |
| DSSP/ AlphaFold2                     | 13 | 4  | 4  | 79 |       | DSSP/ AlphaFold2 | 13 | 4  | 83 |
| DSSP/PDB                             | -  | -  | -  | -  |       | DSSP/PDB         | -  | -  | -  |
| BeStSel                              | 6  | 27 | 19 | 48 | 0.024 | K2D3             | 4  | 37 | 59 |
| <b>Amelogenin</b> Mostly disordered  |    |    |    |    |       |                  |    |    |    |
| Method/cutoff                        | H  | E  | T  | D  | NRMSD | H                | E  | O  |    |
| DSSP/ AlphaFold2                     | 15 | 0  | 4  | 81 |       | DSSP/ AlphaFold2 | 15 | 0  | 85 |
| DSSP/PDB                             | -  | -  | -  | -  |       | DSSP/PDB         | -  | -  | -  |
| BeStSel                              | 14 | 23 | 20 | 49 | 0.017 | K2D3             | 5  | 31 | 64 |
| <b>BB1 1-94</b> Mostly disordered    |    |    |    |    |       |                  |    |    |    |
| Method/cutoff                        | H  | E  | T  | D  | NRMSD | H                | E  | O  |    |
| DSSP/ AlphaFold2                     | 23 | 0  | 2  | 75 |       | DSSP/ AlphaFold2 | 23 | 0  | 77 |
| DSSP/PDB                             | -- | -  | -  | -  |       | DSSP/PDB         | -  | -  | -  |
| BeStSel                              | 4  | 26 | 19 | 48 | 0.024 | K2D3             | 4  | 33 | 63 |
| <b>β-2 microglobulin</b> Mostly β1   |    |    |    |    |       |                  |    |    |    |
| Method/cutoff                        | H  | E  | T  | D  | NRMSD | H                | E  | O  |    |
| DSSP/ AlphaFold2                     | 0  | 47 | 10 | 43 |       | DSSP/ AlphaFold2 | 0  | 47 | 53 |
| DSSP / PDB 2YXF                      | 3  | 48 | 9  | 41 |       | DSSP/PDB 2YXF    | 3  | 48 | 49 |
| BeStSel                              | 0  | 48 | 10 | 41 | 0.023 | K2D3             | 1  | 43 | 56 |
| <b>Prealbumin</b> Mostly β1          |    |    |    |    |       |                  |    |    |    |
| Method/cutoff                        | H  | E  | T  | D  | NRMSD | H                | E  | O  |    |
| DSSP/ AlphaFold2                     | 6  | 45 | 16 | 34 |       | DSSP/ AlphaFold2 | 6  | 45 | 49 |
| DSSP / PDB 2PAB                      | 6  | 46 | 9  | 36 |       | DSSP/PDB 2PAB    | 6  | 46 | 48 |
| BeStSel                              | 8  | 48 | 10 | 44 | 0.010 | K2D3             | 4  | 40 | 56 |
| <b>Bence Jones protein</b> Mostly β1 |    |    |    |    |       |                  |    |    |    |
| Method/cutoff                        | H  | E  | T  | D  | NRMSD | H                | E  | O  |    |
| DSSP/ AlphaFold2                     | 3  | 47 | 19 | 31 |       | DSSP/ AlphaFold2 | 3  | 47 | 50 |
| DSSP / PDB 2RHE                      | 3  | 43 | 20 | 34 |       | DSSP/PDB 2RHE    | 3  | 43 | 54 |
| BeStSel                              | 5  | 42 | 12 | 41 | 0.024 | K2D3             | 2  | 42 | 56 |

| eGFP                  |    |    |    |    |       |                  |    |    |    |
|-----------------------|----|----|----|----|-------|------------------|----|----|----|
| Mostly $\beta$ 1      |    |    |    |    |       |                  |    |    |    |
| Method/cutoff         | H  | E  | T  | D  | NRMSD | H                | E  | O  |    |
| DSSP/ AlphaFold2      | 22 | 44 | 12 | 22 |       | DSSP/ AlphaFold2 | 22 | 44 | 34 |
| DSSP/PDB              | -  | -  | -  | -  |       | DSSP/PDB         | -  | -  | -  |
| BeStSel               | 13 | 33 | 11 | 43 | 0.084 | K2D3             | 6  | 41 | 53 |
| MAGI 1PDZ1            |    |    |    |    |       |                  |    |    |    |
| Mostly $\beta$ 2      |    |    |    |    |       |                  |    |    |    |
| Method                | H  | E  | T  | D  | NRMSD | H                | E  | O  |    |
| DSSP/ AlphaFold2      | 14 | 25 | 14 | 47 |       | DSSP/ AlphaFold2 | 14 | 25 | 61 |
| DSSP /PDB 2KPK        | 12 | 32 | 15 | 42 |       | DSSP/PDB 2KPK    | 12 | 32 | 56 |
| BeStSel               | 9  | 21 | 14 | 56 | 0.024 | K2D3             | 13 | 21 | 66 |
| UTPase                |    |    |    |    |       |                  |    |    |    |
| Mostly $\beta$ 2      |    |    |    |    |       |                  |    |    |    |
| Method                | H  | E  | T  | D  | NRMSD | H                | E  | O  |    |
| DSSP/ AlphaFold2      | 6  | 35 | 11 | 49 |       | DSSP/ AlphaFold2 | 6  | 35 | 59 |
| DSSP /PDB 1Q5U        | 5  | 39 | 10 | 47 |       | DSSP/PDB 1Q5U    | 5  | 39 | 56 |
| BeStSel               | 1  | 36 | 10 | 53 | 0.027 | K2D3             | 8  | 29 | 63 |
| Ecotin                |    |    |    |    |       |                  |    |    |    |
| Mostly $\beta$ 2      |    |    |    |    |       |                  |    |    |    |
| Method                | H  | E  | T  | D  | NRMSD | H                | E  | O  |    |
| DSSP/ AlphaFold2      | 8  | 45 | 8  | 40 |       | DSSP/ AlphaFold2 | 8  | 45 | 47 |
| DSSP / PDB 1ECZ       | 2  | 40 | 9  | 49 |       | DSSP/PDB 1ECZ    | 2  | 40 | 58 |
| BeStSel               | 8  | 35 | 5  | 50 | 0.039 | K2D3             | 7  | 26 | 67 |
| trypsin               |    |    |    |    |       |                  |    |    |    |
| mostly $\beta$ 2      |    |    |    |    |       |                  |    |    |    |
| Method                | H  | E  | T  | D  | NRMSD | H                | E  | O  |    |
| DSSP/ AlphaFold2      | 10 | 29 | 14 | 47 |       | DSSP/ AlphaFold2 | 10 | 29 | 61 |
| DSSP /PDB 1AUJ        | 10 | 29 | 13 | 48 |       | DSSP/PDB 1AUJ    | 10 | 29 | 61 |
| BeStSel               | 8  | 33 | 17 | 43 | 0.029 | K2D3             | 4  | 36 | 60 |
| Pokeweed lectin       |    |    |    |    |       |                  |    |    |    |
| mostly $\alpha/\beta$ |    |    |    |    |       |                  |    |    |    |
| Method                | H  | E  | T  | D  | NRMSD | H                | E  | O  |    |
| DSSP/ AlphaFold2      | 17 | 7  | 23 | 54 |       | DSSP/ AlphaFold2 | 17 | 7  | 76 |
| DSSP/PDB              | -  | -  | -  | -  |       | DSSP/PDB         | -  | -  | -  |
| BeStSel               | 14 | 28 | 15 | 43 | 0.044 | K2D3             | 3  | 38 | 59 |
| Saporin               |    |    |    |    |       |                  |    |    |    |
| mostly $\alpha/\beta$ |    |    |    |    |       |                  |    |    |    |
| Method                | H  | E  | T  | D  | NRMSD | H                | E  | O  |    |
| DSSP/ AlphaFold2      | 33 | 17 | 11 | 39 |       | DSSP/ AlphaFold2 | 33 | 17 | 50 |
| DSSP /PDB 1Q17        | 37 | 20 | 12 | 32 |       | DSSP/PDB 1Q17    | 37 | 20 | 43 |
| BeStSel               | 34 | 8  | 20 | 38 | 0.027 | K2D3             | 27 | 21 | 52 |
| $\alpha$ -lactalbumin |    |    |    |    |       |                  |    |    |    |
| mostly $\alpha$       |    |    |    |    |       |                  |    |    |    |
| Method                | H  | E  | T  | D  | NRMSD | H                | E  | O  |    |
| DSSP/ AlphaFold2      | 40 | 6  | 14 | 41 |       | NRMSD            | 40 | 6  | 54 |
| DSSP/PDB 1HML         | 43 | 7  | 19 | 32 |       |                  | 43 | 7  | 50 |
| BeStSel               | 33 | 11 | 16 | 41 | 0.016 | K2D3             | 32 | 16 | 52 |

**Supplementary Table S7. Calculated secondary structures for the disordered test proteins using the SESCO method<sup>13</sup>.** The basis spectra were derived from the IDP175 dataset (left) and DSSP-F (right). The designations of the secondary structure types are the same as those used the DichroIDP application [where H= helix, E= sheet, T=turn, D=disordered] as described in the methods section. DSSP-F is a dataset which comes as part of the SESCO package and is based on SP175. Side chain corrections were implemented in SESCO.

| <b>Osteopontin</b> |          | <b>IDP175</b> |          |          |              |                  | <b>DSSP-F</b> |          |          |              |       |
|--------------------|----------|---------------|----------|----------|--------------|------------------|---------------|----------|----------|--------------|-------|
| <b>Method</b>      | <b>H</b> | <b>E</b>      | <b>T</b> | <b>D</b> | <b>NRMSD</b> | <b>H</b>         | <b>E</b>      | <b>T</b> | <b>D</b> | <b>NRMSD</b> |       |
| DSSP/ AlphaFold2   | 9        | 0             | 1        | 91       |              | DSSP/ AlphaFold2 | 9             | 0        | 1        | 91           |       |
| DSSP/PDB           | -        | -             | -        | -        |              | DSSP/PDB         | -             | -        | -        |              |       |
| SESCA              | 9        | 0             | 0        | 90       | 0.069        | SESCA            | 1             | 25       | 36       | 38           | 0.087 |

  

| <b>Sic1</b>      |          | <b>IDP175</b> |          |          |              |                  | <b>DSSP-F</b> |          |          |              |       |
|------------------|----------|---------------|----------|----------|--------------|------------------|---------------|----------|----------|--------------|-------|
| <b>Method</b>    | <b>H</b> | <b>E</b>      | <b>T</b> | <b>D</b> | <b>NRMSD</b> | <b>H</b>         | <b>E</b>      | <b>T</b> | <b>D</b> | <b>NRMSD</b> |       |
| DSSP/ AlphaFold2 | 13       | 4             | 10       | 74       |              | DSSP/ AlphaFold2 | 13            | 4        | 10       | 74           |       |
| DSSP/PDB         | -        | -             | -        | -        |              | DSSP/PDB         | -             | -        | -        |              |       |
| SESCA            | 14       | 0             | 11       | 75       | 0.027        | SESCA            | 7             | 12       | 17       | 64           | 0.040 |

  

| <b>Amelogenin</b> |          | <b>IDP175</b> |          |          |              |                  | <b>DSSP-F</b> |          |          |              |       |
|-------------------|----------|---------------|----------|----------|--------------|------------------|---------------|----------|----------|--------------|-------|
| <b>Method</b>     | <b>H</b> | <b>E</b>      | <b>T</b> | <b>D</b> | <b>NRMSD</b> | <b>H</b>         | <b>E</b>      | <b>T</b> | <b>D</b> | <b>NRMSD</b> |       |
| DSSP/ AlphaFold2  | 15       | 0             | 7        | 78       |              | DSSP/ AlphaFold2 | 15            | 0        | 7        | 78           |       |
| DSSP/PDB          | -        | -             | -        | -        |              | DSSP/PDB         | -             | -        | -        |              |       |
| SESCA             | 19       | 2             | 4        | 75       | 0.066        | SESCA            | 11            | 15       | 5        | 70           | 0.081 |

  

| <b>BB1 1-94</b>  |          | <b>IDP175</b> |          |          |              |                  | <b>DSSP-F</b> |          |          |              |       |
|------------------|----------|---------------|----------|----------|--------------|------------------|---------------|----------|----------|--------------|-------|
| <b>Method</b>    | <b>H</b> | <b>E</b>      | <b>T</b> | <b>D</b> | <b>NRMSD</b> | <b>H</b>         | <b>E</b>      | <b>T</b> | <b>D</b> | <b>NRMSD</b> |       |
| DSSP/ AlphaFold2 | 23       | 0             | 6        | 72       |              | DSSP/ AlphaFold2 | 23            | 0        | 6        | 72           |       |
| DSSP/PDB         | --       | -             | -        | -        |              | DSSP/PDB         | -             | -        | -        | -            |       |
| SESCA            | 11       | 0             | 3        | 86       | 0.102        | SESCA            | 3             | 15       | 11       | 71           | 0.057 |

**Supplementary Figure S1. Spectra not included in the IDP dataset.** All are typical for disordered spectra. Purple: SHERP; Blue: Alpha synuclein; Red: Beta synuclein; Green: TARP<sub>726-825</sub>, but various analysis methods do not identify them as disordered (see text).

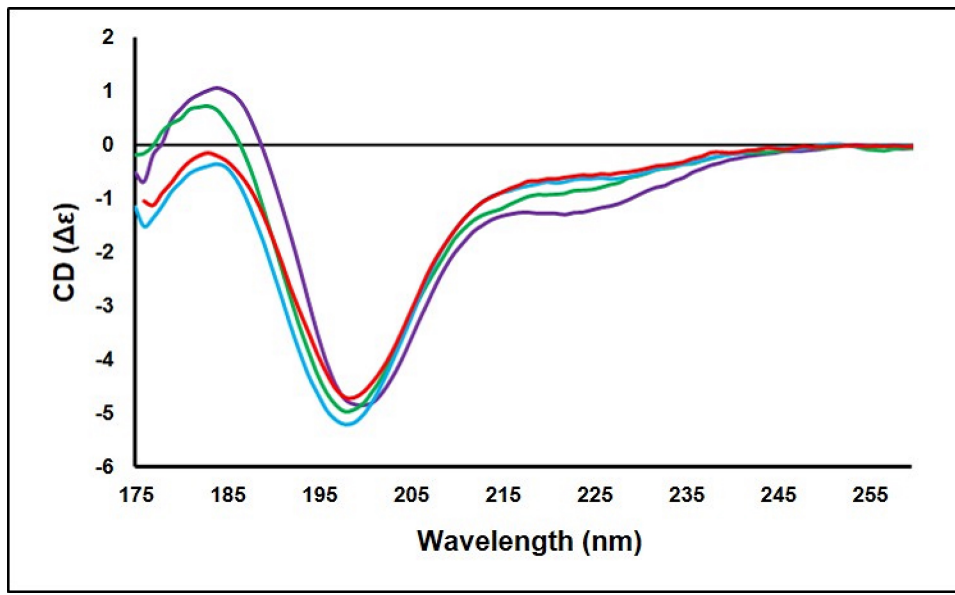

Supplement: 42003_2023_5178_MOESM1_ESM.pdf [file 42003_2023_5178_MOESM1_ESM.pdf]
